# Supplementary material for: Luminescent bio-sensors via co-assembly of hen egg white lysozyme with Eu3+/Tb3+-complexes
Source: Royal Society of Chemistry journal article supplement (doi:10.1039/d4tb01766h), 2025-01-01
Supplement: d4tb01766h1.pdf [file d4tb01766h1.pdf]

## Supporting Information

### Contents:

**Figure S1:** Small angle X-ray scattering pattern of assembly prepared by anti solvent co deposition method.

**Figure S2:** The effect of different concentrations of valine on the luminescence of two types of block co-assembly.

**Figure S3:** The fluorescence or quenching effects of 12 non-essential amino acids on two block co-assembly.

**Figure S4:** The effect of increasing concentrations of various amino acids on the luminescent co-assembly of doped europium complexes .

**Figure S5:** The effect of increasing concentrations of various amino acids on the luminescent co-assembly of doped terbium complexes .

**Figure 6:** Add 0.1mL of aqueous solutions of different concentrations of valine to 1mL of complex solution, and obtain the variation of complex luminescence intensity with valine concentration.

**Figure S7:** Excitation spectra of (a) ETP and (b) TAP.

**Figure S8:** ETP-HEWL soaked in water for 3 months.

**Table S1:** The parameters of the fitting equation for the effect of essential amino acid concentration on ETA-HEWL within the normal range of the human body.

**Table S2:** The parameters of the fitting equation for the effect of essential amino acid concentration on ETA-HEWL within outside the normal range of the human body.

**Table S3:** The parameters of the fitting equation for the effect of essential amino acid concentration on TAP-HEWL within the normal range of the human body.

**Table S4:** The parameters of the fitting equation for the effect of essential amino acid concentration on TAP-HEWL within outside the normal range of the human body.

**Table S5:** Fluorescence lifetime of Eu (TTA) 3phen mixed with various amino acids.

**Table S6:** Fluorescence lifetime of Tb (ACAC) 3phen mixed with various amino acids.

**Video S1:** Assembly can emit light of different colors as the angle of refracted light changes under a polarizing microscope.

Figure S1

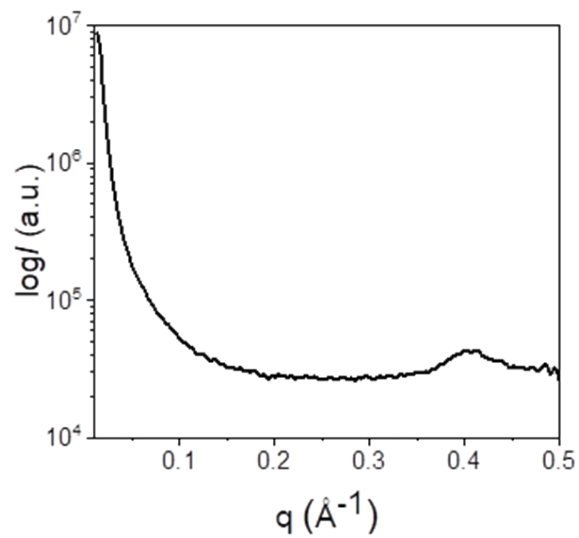

Figure S2

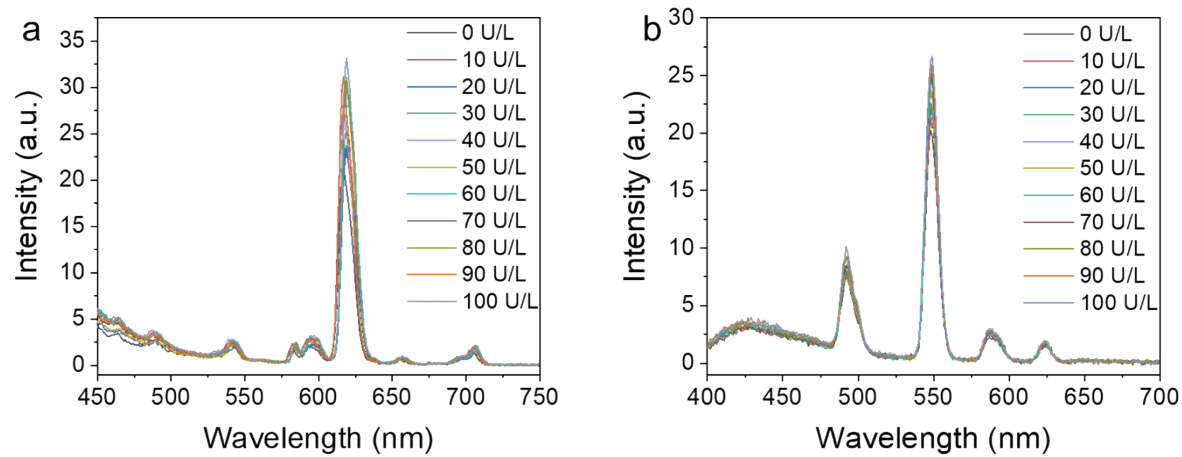

Figure S3

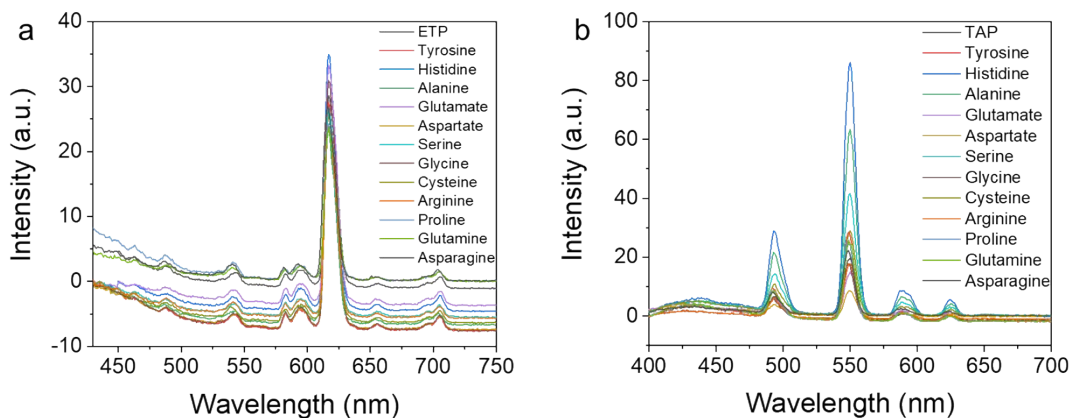

Figure S4

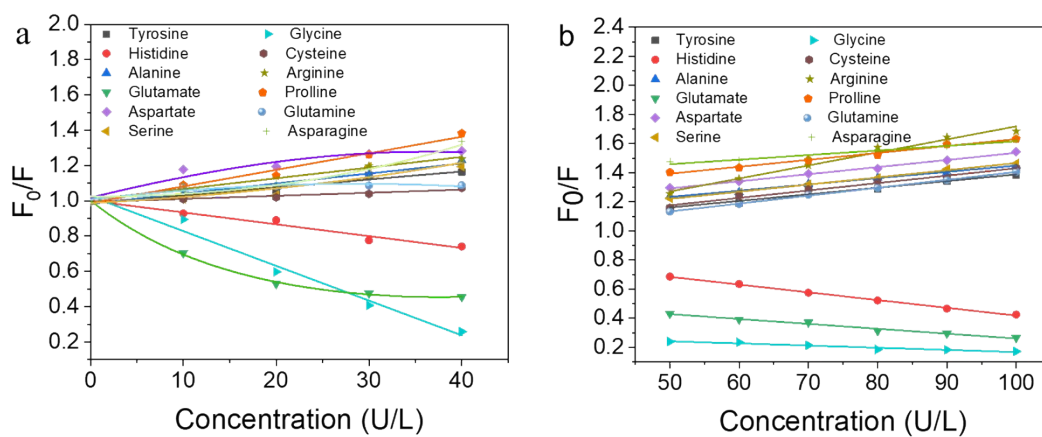

Figure S5

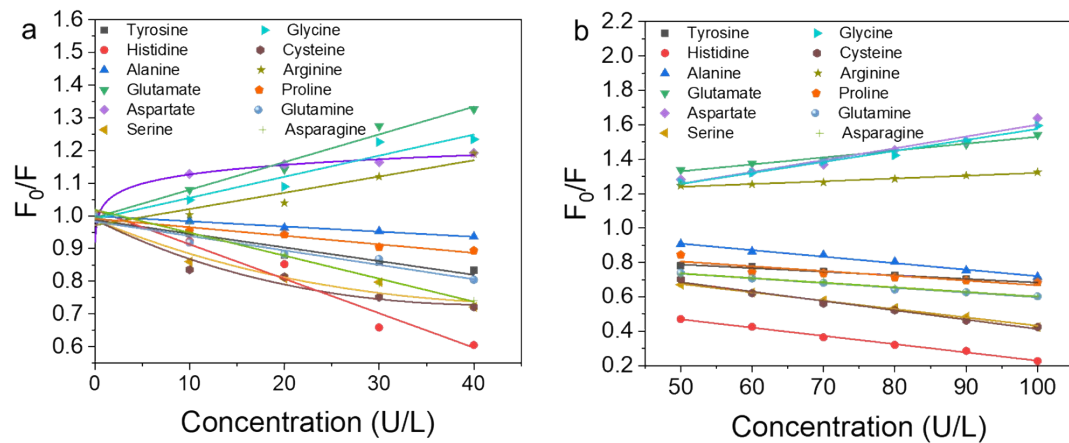

Figure S6

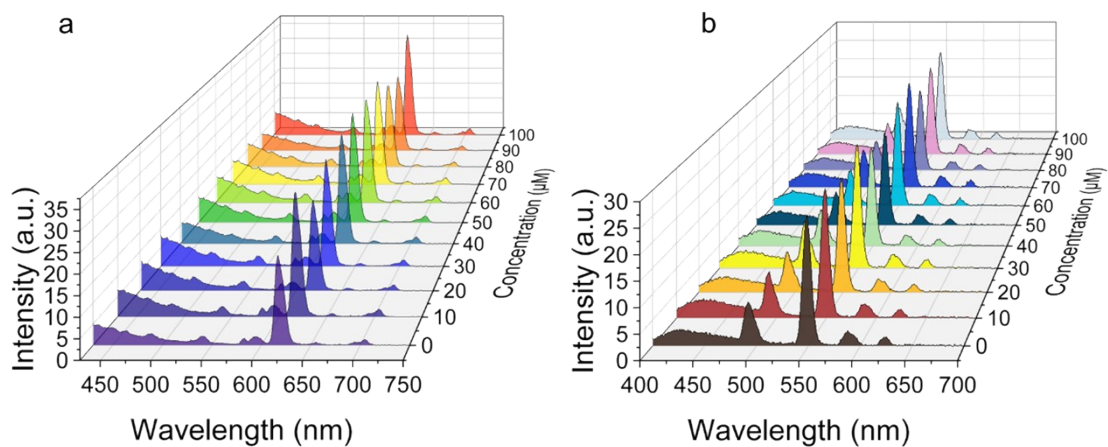

Figure S7

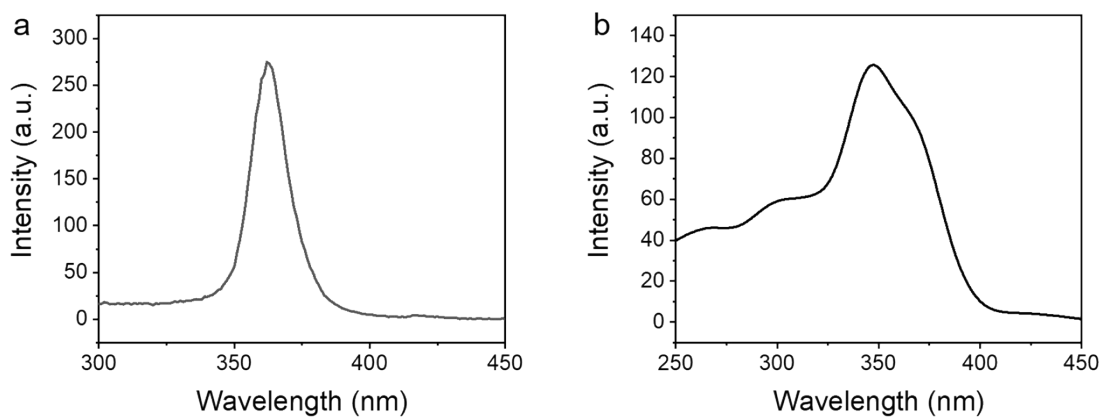

Figure S8

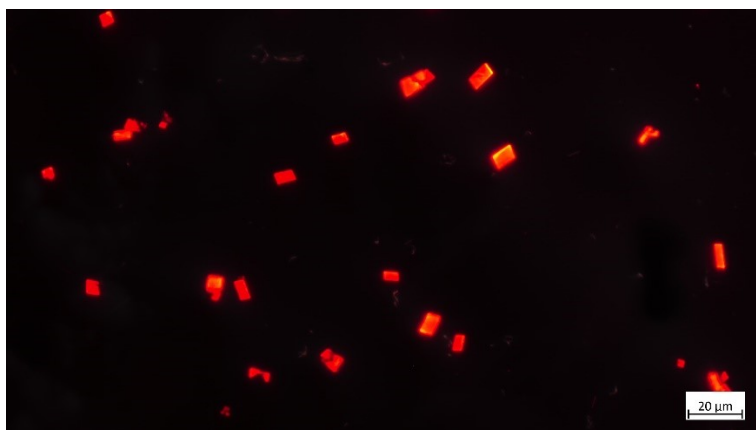

Table S1

| amino acid    | A | K       | a | B | b <sub>1</sub> | b <sub>2</sub> | b <sub>3</sub> | R <sup>2</sup> |
|---------------|---|---------|---|---|----------------|----------------|----------------|----------------|
| Tryptophane   | 0 |         |   | 1 | 0.01921        | -15.16754      | 0.98264        | 0.99793        |
| Threonine     |   |         |   |   | -0.16230       | 7.05220        | 1.146328       | 0.97052        |
| Valine        |   |         |   |   | -0.00518       | -11.35278      | 1.00566        | 0.99135        |
| Phenylalanine |   |         |   |   | 0.03331        | -22.69949      | 0.96863        | 0.99312        |
| Leucine       |   |         |   |   | 0.06035        | -23.61215      | 0.92632        | 0.94132        |
| Methionine    | 1 | 0.00839 | 1 | 0 |                |                |                | 0.99226        |
| Lysine        | 0 |         |   | 1 | -0.08560       | 14.90085       | 1.08518        | 0.99779        |
| Isoleucine    |   |         |   |   | -0.22556       | 22.86966       | 1.21870        | 0.94446        |

Table S2

| amino acid    | A | K        | a       | B | b <sub>1</sub> | b <sub>2</sub> | b <sub>3</sub> | R <sup>2</sup> |
|---------------|---|----------|---------|---|----------------|----------------|----------------|----------------|
| Tryptophane   | 0 |          |         | 1 | 0.00124        | 1.5253         | 1.27674        | 0.99203        |
| Threonine     | 1 | 0.00108  | 1.11545 | 0 |                |                |                | 0.96936        |
| Valine        |   | -0.00215 | 0.94634 |   |                |                |                | 0.95689        |
| Phenylalanine |   | 0.00792  | 0.84452 |   |                |                |                | 0.97334        |
| Leucine       |   | 0.00375  | 1.05820 |   |                |                |                | 0.94050        |
| Methionine    |   | 0.00362  | 1.20406 |   |                |                |                | 0.95747        |
| Lysine        |   | 0.00372  | 0.88091 |   |                |                |                | 0.94282        |
| Isoleucine    |   | 0.00674  | 0.83907 |   |                |                |                | 0.93721        |

Table S3

| amino acid    | A | K        | a | B | b <sub>1</sub> | b <sub>2</sub> | b <sub>3</sub> | R <sup>2</sup> |
|---------------|---|----------|---|---|----------------|----------------|----------------|----------------|
| Tryptophane   | 1 | -0.00520 | 1 | 0 |                |                |                | 0.94418        |
| Threonine     |   | -0.00480 |   |   |                |                |                | 0.96583        |
| Valine        |   | -0.00402 |   |   |                |                |                | 0.97682        |
| Phenylalanine |   | -0.00384 |   |   |                |                |                | 0.93268        |
| Leucine       |   | -0.00480 |   |   |                |                |                | 0.96421        |
| Methionine    |   | -0.00156 |   |   |                |                |                | 0.98057        |
| Lysine        |   | -0.00674 |   |   |                |                |                | 0.97080        |
| Isoleucine    |   | 0        |   |   |                |                |                | 1              |

Table S4

| amino acid    | A | K        | a       | B | b <sub>1</sub> | b <sub>2</sub> | b <sub>3</sub> | R <sup>2</sup> |
|---------------|---|----------|---------|---|----------------|----------------|----------------|----------------|
| Tryptophane   | 1 | -0.00546 | 1.08047 | 0 |                |                |                | 0.97503        |
| Threonine     |   | -0.00434 | 0.86732 |   |                |                |                | 0.98354        |
| Valine        |   | -0.00355 | 0.99316 |   |                |                |                | 0.99268        |
| Phenylalanine |   | 0.00248  | 1.02724 |   |                |                |                | 0.96484        |
| Leucine       |   | -0.00515 | 1.01590 |   |                |                |                | 0.98906        |
| Methionine    |   | -0.00260 | 1.04444 |   |                |                |                | 0.94411        |
| Lysine        |   | -0.00273 | 0.85678 |   |                |                |                | 0.93990        |
| Isoleucine    |   | 0.00254  | 1.82019 |   |                |                |                | 0.93399        |

Table S5

|                             | T (μs) |
|-----------------------------|--------|
| Eu(TTA)3phen                | 219.3  |
| Eu(TTA)3phen +Tryptophane   | 197.7  |
| Eu(TTA)3phen +Threonine     | 208.3  |
| Eu(TTA)3phen +Valine        | 190.4  |
| Eu(TTA)3phen +Phenylalanine | 205.7  |
| Eu(TTA)3phen +Leucine       | 202.4  |
| Eu(TTA)3phen +Methionine    | 202.6  |
| Eu(TTA)3phen +Lysine        | 200.5  |
| Eu(TTA)3phen +Isoleucine    | 183.3  |

Table S6

---

|                              | T ( $\mu$ s) |
|------------------------------|--------------|
| Tb(ACAC)3phen                | 333.0        |
| Tb(ACAC)3phen +Tryptophane   | 250.4        |
| Tb(ACAC)3phen +Threonine     | 305.8        |
| Tb(ACAC)3phen +Valine        | 316.1        |
| Tb(ACAC)3phen +Phenylalanine | 319.5        |
| Tb(ACAC)3phen +Leucine       | 316.0        |
| Tb(ACAC)3phen +Methionine    | 321.9        |
| Tb(ACAC)3phen +Lysine        | 313.8        |
| Tb(ACAC)3phen +Isoleucine    | 312.2        |

---

[Video S1](#)
